# Supplementary material for: Determinants of losses in the latent tuberculosis infection cascade of care in Brazil
Source: PubMed Central journal article supplement (PMC8438757; doi:10.1136/bmjgh-2021-005969), 2021-09-09
Supplement: bmjgh-2021-005969supp001.pdf [file bmjgh-2021-005969supp001.pdf]

1 **Supplementary Material**

2

3 **Content:**

4 **1. Supplementary Table 1**

5 **2. Supplementary Table 2**

6 **3. Supplementary Table 3**

7 **4. Supplementary Table 4**

8 **5. Supplementary Figure 1**

9 **6. Supplementary Figure 2**

10 **7. Supplementary Figure 3**

11 **8. Supplementary Figure 4**

12

13

14 **Supplementary Tables**15 **Supplementary Table 1. Characteristics of contacts according to losses and**  
16 **completeness of LTBI cascade of care**

| <b>Characteristics</b>                                      | <b>Lost in the cascade<br/>(n=895)*</b> | <b>Completed the cascade<br/>(n=1001)</b> | <b>p-value</b> |
|-------------------------------------------------------------|-----------------------------------------|-------------------------------------------|----------------|
| <b>Female– no. (%)</b>                                      | 538 (60)                                | 589 (59)                                  | 0.542          |
| <b>Age – median (IQR)</b>                                   | 31 (16-47)                              | 33 (17-47)                                | 0.078          |
| <b>Race/Ethnicity – no. (%)</b>                             |                                         |                                           | 0.024          |
| Black/ Pardo                                                | 741 (83)                                | 761 (76)                                  |                |
| Others                                                      | 153 (17)                                | 240 (24)                                  |                |
| <b>Income – no. (%)</b>                                     |                                         |                                           | 0.009          |
| More than a minimum wage                                    | 285 (33)                                | 412 (43)                                  |                |
| Equal or less than a minimum wage                           | 386 (44)                                | 365 (38)                                  |                |
| Without income                                              | 197 (23)                                | 189 (19)                                  |                |
| <b>BCG scar – no. (%)</b>                                   | 802 (90)                                | 893 (89)                                  | 0.820          |
| <b>Time (V1<sub>TB</sub>-V1<sub>C</sub>) – median (IQR)</b> | 33 (8-82)                               | 41 (14-102)                               | 0.055          |
| <b>HIV infection – no. (%)</b>                              | 31 (4)                                  | 15 (2)                                    | 0.018          |
| <b>Antiretroviral therapy – no. (%)</b>                     | 23 (74)                                 | 13 (87)                                   | 0.460          |
| <b>Education– no. (%)</b>                                   |                                         |                                           | <0.001         |
| Literate                                                    | 753 (84)                                | 950 (95)                                  |                |
| Illiterate                                                  | 141 (16)                                | 50 (5)                                    |                |

|                                                        |           |           |       |
|--------------------------------------------------------|-----------|-----------|-------|
| <b>Smoking – no. (%)</b>                               | 247 (28)  | 254 (25)  | 0.427 |
| <b>Secondary smoking – no. (%)</b>                     | 319 (36)  | 284 (28)  | 0.105 |
| <b>Alcohol consumption – no. (%)</b>                   | 471 (53)  | 545 (54)  | 0.433 |
| <b>Alcohol consumption (years)-median (IQR)</b>        | 12 (4-22) | 11 (3-20) | 0.337 |
| <b>CAGE score of 2 and above<sup>a</sup> – no. (%)</b> | 82 (26)   | 96 (29)   | 0.333 |
| <b>Illicit drug use – no. (%)</b>                      | 91 (10)   | 97 (10)   | 0.758 |
| <b>Comorbidities<sup>b</sup> – no. (%)</b>             | 241 (27)  | 204 (20)  | 0.069 |
| Diabetes                                               | 43 (5)    | 52 (5)    | 0.752 |
| Hypertension                                           | 132 (15)  | 101 (10)  | 0.003 |

17

18 **Table note:** Data represent no. (%), except for age time, which is presented as  
 19 median and interquartile range (IQR) Continuous variables were compared using  
 20 the Mann-Whitney *U* test and categorical variables were using the Fisher's exact  
 21 test (2x2) or Pearson's chi-square test. Time ( $V1_{TB}-V1_C$ ): time (in weeks) difference  
 22 between the visit 1 of the TB case and the visit 1 of the contact.

23 \*Five contacts are ongoing in the TPT

24 <sup>a</sup>Alcohol abuse was defined as a CAGE score  $\geq 2$  points (*Ewing, J.A. 1984. Detecting alcoholism: The CAGE questionnaire. JAMA.*)

26 <sup>b</sup> Comorbidities: At least one comorbidity (diabetes, hypertension, cancer, chronic  
 27 obstructive pulmonary /emphysema, kidney disease, heart disease, liver disease  
 28 and depression)

29 Abbreviations: TB: tuberculosis. LTBI: latent tuberculosis infection. TPT: TB  
 30 preventive therapy

31

32

33

34

35

36

37 **Supplementary Table 2. Characteristics of contacts according to Initiation of**38 **recommended TPT**

| Characteristics                                             | No initiation of | Initiation of | p-value |
|-------------------------------------------------------------|------------------|---------------|---------|
|                                                             | recommended      | recommended   |         |
|                                                             | TPT              | TPT           |         |
|                                                             | (n=492)          | (n=454*)      |         |
| <b>Female– no. (%)</b>                                      | 299 (61)         | 272 (60)      |         |
| <b>Age – median (IQR)</b>                                   | 32.5 (11-48)     | 32.6 (15-48)  | 0.902   |
| <b>Race/Ethnicity – no. (%)</b>                             |                  |               | 0.247   |
| Black/ Pardo                                                | 408 (83)         | 362 (80)      |         |
| Others                                                      | 83 (17)          | 92 (20)       |         |
| <b>Income – no. (%)</b>                                     |                  |               | 0.005   |
| More than a minimum wage                                    | 150 (31)         | 171 (39)      |         |
| Equal or less than a minimum wage                           | 236 (49)         | 175 (40)      |         |
| Without income                                              | 94 (20)          | 92 (21)       |         |
| <b>BCG scar – no. (%)</b>                                   | 444 (90)         | 400 (88)      | 0.296   |
| <b>Time (V1<sub>TB</sub>-V1<sub>C</sub>) – median (IQR)</b> | 24 (7-71)        | 45 (15-102)   | 0.027   |
| <b>HIV infection – no. (%)</b>                              | 19 (4)           | 26 (6)        | 0.555   |
| <b>Antiretroviral therapy – no. (%)</b>                     | 12 (63)          | 23 (89)       | 0.070   |
| <b>Education– no. (%)</b>                                   |                  |               | <0.001  |
| Literate                                                    | 379 (77)         | 404 (89)      |         |

|                                                            |           |           |       |
|------------------------------------------------------------|-----------|-----------|-------|
| Illiterate                                                 | 113 (23)  | 50 (11)   |       |
| <b>Smoking – no. (%)</b>                                   | 131 (27)  | 134 (30)  | 0.911 |
| <b>Secondary smoking – no. (%)</b>                         | 190 (39)  | 134 (30)  | 0.001 |
| <b>Alcohol consumption – no. (%)</b>                       | 233 (47)  | 233 (51)  | 0.241 |
| <b>Alcohol consumption (years)-<br/>median (IQR)</b>       | 14 (5-21) | 13 (4-23) | 0.918 |
| <b>CAGE score of 2 and above<sup>a</sup><br/>– no. (%)</b> | 31 (20)   | 40 (29)   | 0.133 |
| <b>Illicit drug use – no. (%)</b>                          | 37 (8)    | 54 (12)   | 0.128 |
| <b>Comorbidities<sup>b</sup> – no. (%)</b>                 | 128 (26)  | 102 (23)  | 0.295 |
| Diabetes                                                   | 23 (5)    | 20 (4)    | 0.880 |
| Hypertension                                               | 65 (13)   | 64 (14)   | 0.705 |

39 **Table note:** Data represent no. (%), except for age and time, which is presented  
 40 as median and interquartile range (IQR) Continuous variables were compared  
 41 using the Mann-Whitney *U* test and categorical variables were using the Fisher's  
 42 exact test (2x2) or Pearson's chi-square test. Time (V1<sub>TB</sub>-V1<sub>C</sub>): time (in weeks)  
 43 difference between the visit 1 of the TB case and the visit 1 of the contact.

44 \* Among those to whom TPT was recommended (n=933)

45 <sup>a</sup> Alcohol abuse was defined as a CAGE score  $\geq 2$  points as described in Methods.

46 <sup>b</sup> Comorbidities: At least one comorbidity (diabetes, hypertension, cancer, chronic  
 47 obstructive pulmonary /emphysema, kidney disease, heart disease, liver disease  
 48 and depression)

49 Abbreviations: TB: tuberculosis. TPT: TB preventive therapy

50

51

52

53

54

55

56

57

58 **Supplementary Table 3. Characteristics of contacts according to complete TB**  
 59 **preventive therapy**

| Characteristics                                             | Incomplete      | Complete       | p-value |
|-------------------------------------------------------------|-----------------|----------------|---------|
|                                                             | TPT<br>(n=202*) | TPT<br>(n=247) |         |
| <b>Female– no. (%)</b>                                      | 116 (57)        | 153 (62)       | 0.470   |
| <b>Age – median (IQR)</b>                                   | 28.2 (15-43)    | 37.5 (15-53)   | 0.004   |
| <b>Race/Ethnicity – no. (%)</b>                             |                 |                | 0.012   |
| Black/ Pardo                                                | 172 (85)        | 185 (75)       |         |
| Others                                                      | 30 (15)         | 62 (25)        |         |
| <b>Income – no. (%)</b>                                     |                 |                | 0.030   |
| More than a minimum wage                                    | 66 (34)         | 105 (44)       |         |
| Equal or less than a minimum wage                           | 82 (42)         | 92 (39)        |         |
| Without income                                              | 47 (24)         | 41 (17)        |         |
| <b>BCG scar – no. (%)</b>                                   | 176 (87)        | 219 (89)       | 0.663   |
| <b>Time (V1<sub>TB</sub>-V1<sub>C</sub>) – median (IQR)</b> | 45 (14-92)      | 47 (17-106)    | 0.217   |
| <b>HIV infection – no. (%)</b>                              | 12 (6)          | 14 (6)         | 0.361   |
| <b>Antiretroviral therapy – no. (%)</b>                     | 11 (92)         | 12 (86)        | 1.000   |
| <b>Education– no. (%)</b>                                   |                 |                | 0.982   |
| Literate                                                    | 176 (87)        | 224 (91)       |         |
| Illiterate                                                  | 26 (13)         | 23 (9)         |         |
| <b>Smoking – no. (%)</b>                                    | 55 (27)         | 77 (31)        | 0.195   |

|                                                        |           |           |       |
|--------------------------------------------------------|-----------|-----------|-------|
| <b>Secondary smoking – no. (%)</b>                     | 63 (31)   | 69 (28)   | 0.641 |
| <b>Alcohol consumption – no. (%)</b>                   | 111 (55)  | 119 (48)  | 0.156 |
| <b>Alcohol consumption (years)- median (IQR)</b>       | 12 (3-24) | 14 (4-23) | 0.581 |
| <b>CAGE score of 2 and above<sup>a</sup> – no. (%)</b> | 26 (34)   | 12 (19)   | 0.058 |
| <b>Illicit drug use – no. (%)</b>                      | 27 (13)   | 25 (10)   | 0.876 |
| <b>Comorbidities<sup>b</sup> – no. (%)</b>             | 55 (27)   | 47 (19)   | 0.119 |
| Diabetes                                               | 6 (3)     | 14 (6)    | 0.250 |
| Hypertension                                           | 35 (17)   | 29 (12)   | 0.104 |

60 **Table note:** Data represent no. (%), except for age and time, which is presented  
 61 as median and interquartile range (IQR) Continuous variables were compared  
 62 using the Mann-Whitney *U* test and categorical variables were using the Fisher's  
 63 exact test (2x2) or Pearson's chi-square test. Time (V1<sub>TB</sub>-V1<sub>C</sub>): time (in weeks)  
 64 difference between the visit 1 of the TB case and the visit 1 of the contact.

65 \*4 no recommended

66 <sup>a</sup> Alcohol abuse was defined as a CAGE score  $\geq 2$  points as described in Methods

67 <sup>b</sup> Comorbidities: At least one comorbidity (diabetes, hypertension, cancer, chronic  
 68 obstructive pulmonary /emphysema, kidney disease, heart disease, liver disease  
 69 and depression)

70 Abbreviations: TB: tuberculosis. LTBI: latent tuberculosis infection. TPT: TB  
 71 preventive therapy

72

73

74

75

76

77

78

79

80

81 **Supplementary Table 4. Characteristics of contacts according to 2<sup>nd</sup> IGRA**82 **performed**

| <b>Characteristics</b>                                      | <b>2<sup>nd</sup> IGRA not performed<br/>(n=242)</b> | <b>2<sup>nd</sup> IGRA performed<br/>(n= 967)</b> | <b>p-value</b> |
|-------------------------------------------------------------|------------------------------------------------------|---------------------------------------------------|----------------|
| <b>Female– no. (%)</b>                                      | 142 (59)                                             | 548 (57)                                          | 0.836          |
| <b>Age – median (IQR)</b>                                   | 27.1 (16-44.)                                        | 30.3 (15-45)                                      | 0.412          |
| <b>Race/Ethnicity – no. (%)</b>                             |                                                      |                                                   | 0.883          |
| Black/ Pardo                                                | 193 (80)                                             | 749 (78)                                          |                |
| Others                                                      | 48 (20)                                              | 218 (23)                                          |                |
| <b>Income – no. (%)</b>                                     |                                                      |                                                   | 0.048          |
| More than a minimum wage                                    | 81 (35)                                              | 392 (42)                                          |                |
| Equal or less than a minimum wage                           | 83 (36)                                              | 362 (39)                                          |                |
| Without income                                              | 69 (29)                                              | 182 (19)                                          |                |
| <b>BCG scar – no. (%)</b>                                   | 221 (91)                                             | 865 (90)                                          | 0.475          |
| <b>Time (V1<sub>TB</sub>-V1<sub>C</sub>) – median (IQR)</b> | 36 (15-96)                                           | 40 (13-99)                                        | 0.955          |
| <b>HIV infection – no. (%)</b>                              | 7 (3)                                                | 28 (3)                                            | 0.883          |
| <b>Antiretroviral therapy – no. (%)</b>                     | 5 (71)                                               | 24 (86)                                           | 0.576          |
| <b>Education– no. (%)</b>                                   |                                                      |                                                   | 0.632          |
| Literate                                                    | 211 (88)                                             | 860 (89)                                          |                |



|                                                            |           |           |       |
|------------------------------------------------------------|-----------|-----------|-------|
| Illiterate                                                 | 30 (12)   | 106 (11)  |       |
| <b>Smoking – no. (%)</b>                                   | 66 (27)   | 227 (24)  | 0.301 |
| <b>Secondary smoking – no. (%)</b>                         | 76 (32)   | 284 (30)  | 0.872 |
| <b>Alcohol consumption – no. (%)</b>                       | 133 (55)  | 510 (53)  | 0.565 |
| <b>Alcohol consumption (years)-<br/>median (IQR)</b>       | 10 (2-18) | 10 (3-18) | 0.644 |
| <b>CAGE score of 2 and above<sup>a</sup><br/>– no. (%)</b> | 26 (27)   | 101 (32)  | 0.448 |
| <b>Illicit drug use – no. (%)</b>                          | 29 (12)   | 91 (9)    | 0.231 |
| <b>Comorbidities<sup>b</sup>– no. (%)</b>                  | 73 (30)   | 196 (20)  | 0.023 |
| Diabetes                                                   | 19 (8)    | 43 (4)    | 0.049 |
| Hypertension                                               | 40 (17)   | 93 (10)   | 0.004 |

83 **Table note:** Data represent no. (%), except for age and time, which is presented  
 84 as median and interquartile range (IQR). Continuous variables were compared  
 85 using the Mann-Whitney *U* test and categorical variables were using the Fisher's  
 86 exact test (2x2) or Pearson's chi-square test. Time (V1<sub>TB</sub>-V1<sub>C</sub>): time (in weeks)  
 87 difference between the visit 1 of the TB case and the visit 1 of the contact.

88 <sup>a</sup> Alcohol abuse was defined as a CAGE score  $\geq 2$  points as described in Methods.

89 <sup>b</sup> Comorbidities: At least one comorbidity (diabetes, hypertension, cancer, chronic  
 90 obstructive pulmonary /emphysema, kidney disease, heart disease, liver disease  
 91 and depression)

92 Abbreviations: TB: tuberculosis; IGRA: interferon-gamma release assay.

93

94

95

96

97

98

99

100 **Supplementary Figures**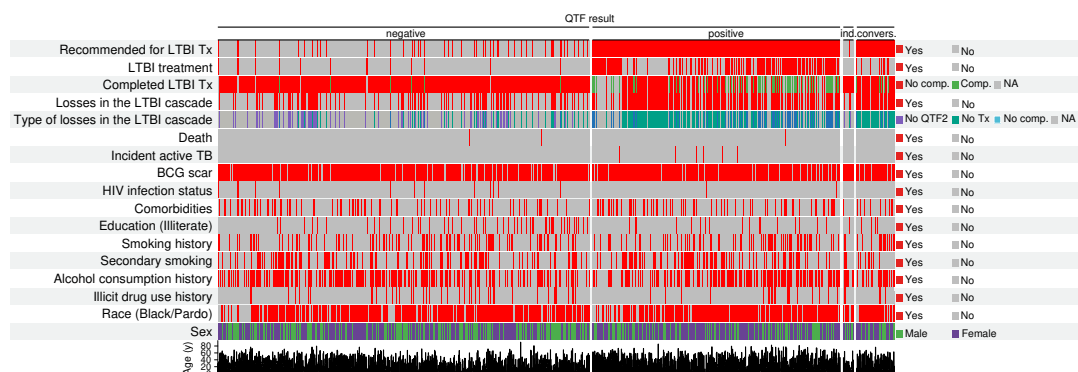

101

102 **Supplementary Figure 1. Characteristics of study participants**

103 Color map based on TB contacts grouped according to final IGRA results shows  
 104 the overall characteristics of the study participants. A hierarchical clustering  
 105 analysis (Ward's method) was employed to group individuals based on the overall  
 106 profile of each study participant which each IGRA subgroup.

107 Alcohol abuse was defined as a CAGE score  $\geq 2$  points. Comorbidities: At least  
 108 one comorbidity (diabetes, hypertension, cancer, chronic obstructive pulmonary  
 109 /emphysema, kidney disease, heart disease, liver disease and depression

110 Abbreviations: IGRA: interferon-gamma release assay, Ind: Indeterminate,  
 111 Convers: conversion, No IGRA 2: Did not perform 2nd IGRA, LTBI: latent  
 112 tuberculosis infection, TB: tuberculosis. TPT: TB preventive therapy.

113

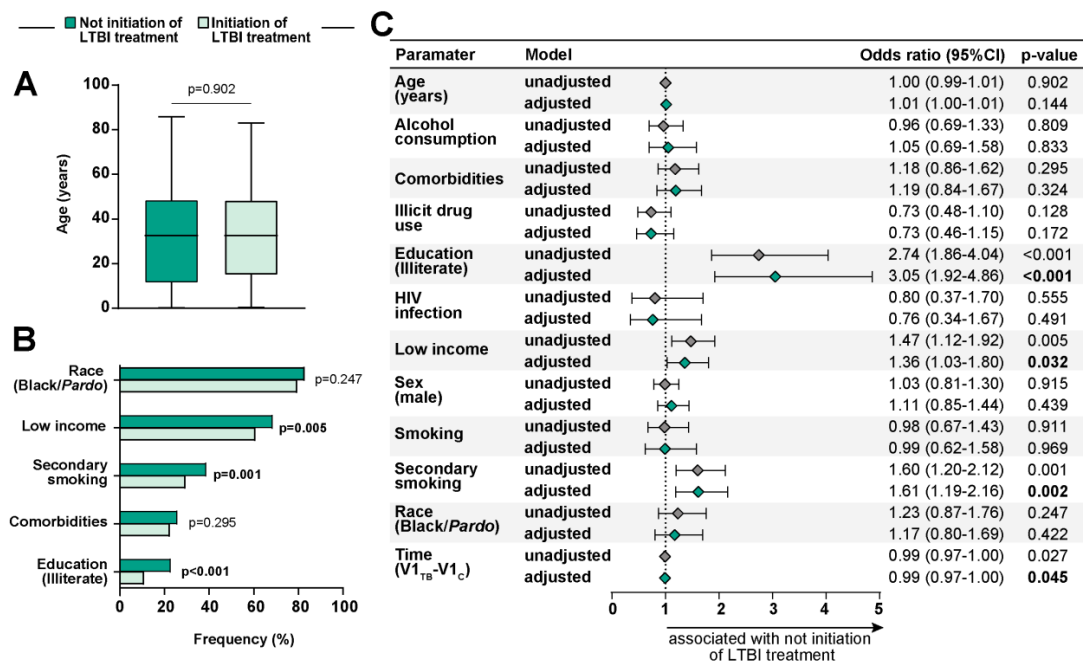

114

115 **Supplementary Figure 2. Association between epidemiological and clinical**  
 116 **characteristics and initiation of TPT**

117 **(A)** Age distribution among TB contacts who did not initiate TPT and those who  
 118 initiated the TPT. Data were compared using the Mann-Whitney *U* test. **(B)**  
 119 Frequency of Race/Ethnicity (black and *pardo*), income (see definition below),  
 120 secondary smoking, comorbidities (see definition below) and education (illiterate)  
 121 between TB contacts stratified based on initiation of TPT. Data were compared  
 122 using Fisher's exact test. **(C)** Generalized estimating equations analysis to  
 123 evaluate association between epidemiological and clinical characteristics and not  
 124 initiation of TPT. The study population was stratified according to initiation of TPT  
 125 (not initiation of TPT and initiation of the TPT, see Supplementary Table 2 for  
 126 detailed univariate comparisons). A multivariable analysis (see Methods for details)  
 127 was employed with each variable individually (unadjusted) and variables (Panels A  
 128 and **C**) were included in a multivariable model (adjusted). In all the comparisons,  
 129 significant p-values are shown in bold-type font.

130 Comorbidities: At least one comorbidity (diabetes, hypertension, cancer, chronic  
131 obstructive pulmonary /emphysema, kidney disease, heart disease, liver disease  
132 and depression).

133 Low income: without income/equal or less than a minimum wage (reference: more  
134 than a minimum wage)

135 Race (Black/*Pardo*) reference: White, Asian, Indian.

136 Abbreviations: 95%CI: 95% confidence interval. Time (V1TB-V1C): time (in weeks)  
137 difference between the visit 1 of the TB case and the visit 1 of the contact. TPT: TB  
138 preventive therapy.

139

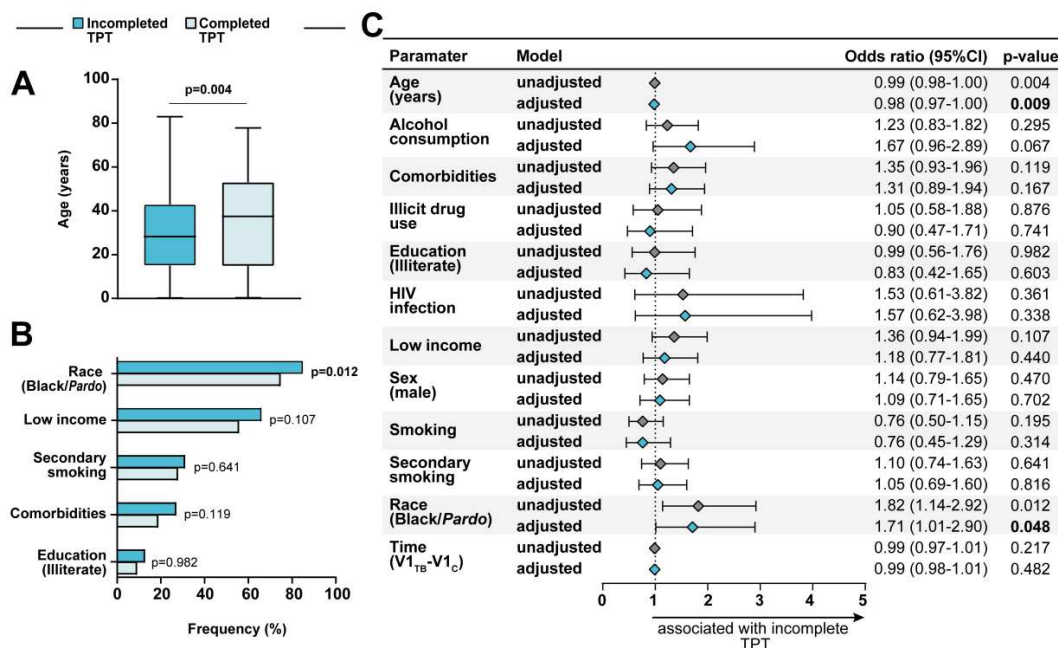

140

141 **Supplementary Figure 3. Association between epidemiological and clinical**  
 142 **characteristics and completeness of the TB preventive therapy**

143 **(A)** Age distribution among those who did not complete the TPT and who complete  
 144 the TPT. Data were compared using the Mann-Whitney *U* test. **(B)** Frequency of  
 145 Race/Ethnicity (black and *pardo*), income (see definition below), secondary  
 146 smoking, comorbidities (see definition below) and education (illiterate) between TB  
 147 contacts stratified based completeness of the TPT (complete vs. incomplete). Data  
 148 were compared using Fisher's exact test. **(C)** Generalized estimating equations  
 149 analysis to evaluate association between epidemiological and clinical  
 150 characteristics and who did not complete the TPT and who complete the TPT. The  
 151 study population was stratified according to complete TPT in the LTBI cascade  
 152 (incomplete TPT vs. complete cascade of care, see Supplementary Table 3 for  
 153 detailed univariate comparisons). A multivariable analysis (see Methods for details)  
 154 was employed with each variable individually (unadjusted) and variables (panels A

155 and **C**) were included in a multivariable model (adjusted). In all the comparisons,  
156 significant p-values are shown in bold-type font.

157 Comorbidities: At least one comorbidity (diabetes, hypertension, cancer, chronic  
158 obstructive pulmonary /emphysema, kidney disease, heart disease, liver disease  
159 and depression).

160 Low income: without income/equal or less than a minimum wage (reference: more  
161 than a minimum wage)

162 Race (Black/*Pardo*) reference: White, Asian, Indian.

163 Abbreviations: 95%CI: 95% confidence interval. Time ( $V1_{TB}-V1_C$ ): time (in weeks)  
164 difference between the visit 1 of the TB case and the visit 1 of the contact. TPT: TB  
165 preventive therapy.

166

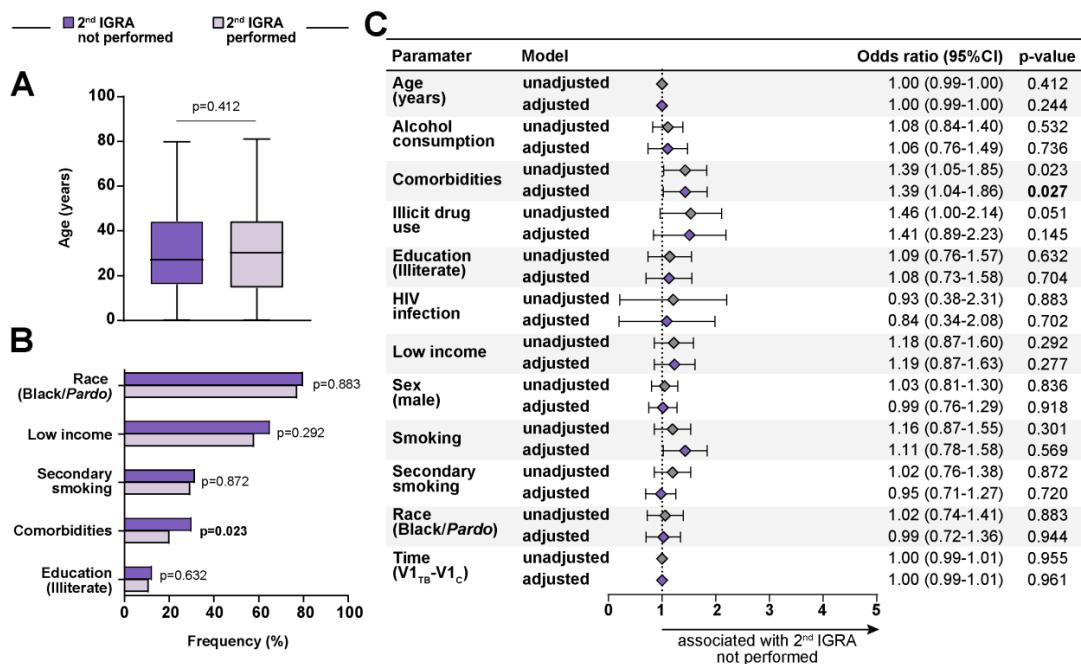

167

168 **Supplementary Figure 4. Association between epidemiological and clinical**169 **characteristics and performing the 2<sup>nd</sup> IGRA test at month 6 when indicated.**170 **(A)** Age distribution among those who performed the 2<sup>nd</sup> IGRA and those not171 performed the 2<sup>nd</sup> IGRA. Data were compared using the Mann-Whitney *U* test. **(B)**172 Frequency of Race/Ethnicity (black and *pardo*), income (see definition below),

173 secondary smoking, comorbidities (see definition below) and education (illiterate)

174 between TB contacts stratified based on performing the 2<sup>nd</sup> IGRA. Data were175 compared using the Fisher's exact test. **(C)** Generalized estimating equations

176 analysis to evaluate association between epidemiological and clinical

177 characteristics and losses in the LTBI cascade of care. The study population was

178 stratified according to perform 2<sup>nd</sup> IGRA (2<sup>nd</sup> IGRA not performed and 2<sup>nd</sup> IGRA

179 performed, see Supplementary Table 3 for detailed univariate comparisons). A

180 multivariable analysis (see Methods for details) was employed with each variable

181 individually (unadjusted) and variables (panels A and C) were included in a

182 multivariable model (adjusted). In all the comparisons, significant p-values are  
183 shown in bold-type font.

184 Comorbidities: At least one comorbidity (diabetes, hypertension, cancer, chronic  
185 obstructive pulmonary /emphysema, kidney disease, heart disease, liver disease  
186 and depression).

187 Low income: without income/equal or less than a minimum wage (reference: more  
188 than a minimum wage)

189 Race (Black/*Pardo*) reference: White, Asian, Indian.

190 Abbreviations: 95%CI: 95% confidence interval. Time (V1TB-V1C): time (in weeks)  
191 difference between the visit 1 of the TB case and the visit 1 of the contact.
